# Supplementary material for: Light-harvesting chlorophyll a/b-binding proteins are required for stomatal response to abscisic acid in Arabidopsis
Source: PubMed Central journal article supplement — J Exp Bot. 2011 Dec 5;63(3):1095–106. doi: 10.1093/jxb/err315 (PMC3276081; doi:10.1093/jxb/err315), 2011-12-05
Supplement: supp_err315_00067462_file001.pdf [file supp_err315_00067462_file001.pdf]

# Light-harvesting chlorophyll a/b-binding proteins are required for stomatal response to abscisic acid in Arabidopsis

Yan-Hong Xu, Rui Liu, Lu Yan, Zhi-Qiang Liu, Shang-Chuan Jiang, Yuan-Yue Shen, Xiao-Fang Wang, & Da-Peng Zhang

## Supplementary Data

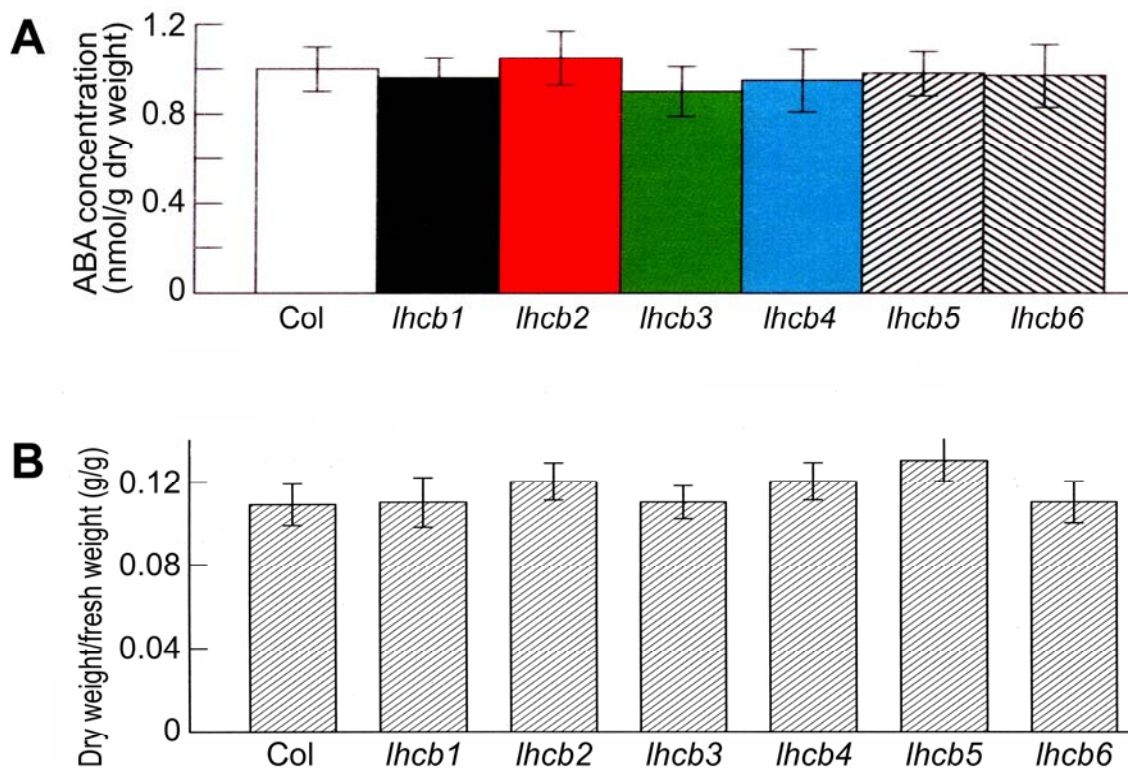

**Supplementary Fig. S1.** Concentrations of endogenous ABA and accumulation of dry substances of the different *lhcb* mutant plants. Two-week-old plants of the different mutants and wild-type Col plants were used for these assays. **(A)** ABA levels. The rosette leaves were used to assay ABA concentrations by ELISA method using a kit (Plant Growth Regulator Immunoassay Detection Kit, PGR1, Sigma) according to the procedures provided by the kit supplier. **(B)** Accumulation of dry substances estimated by dry weight/fresh weight. Note that there is no significant difference in the ABA levels and accumulation of dry substances between the mutants and the wild-type plants. Each value is the mean  $\pm$  SE of three biological determinations.

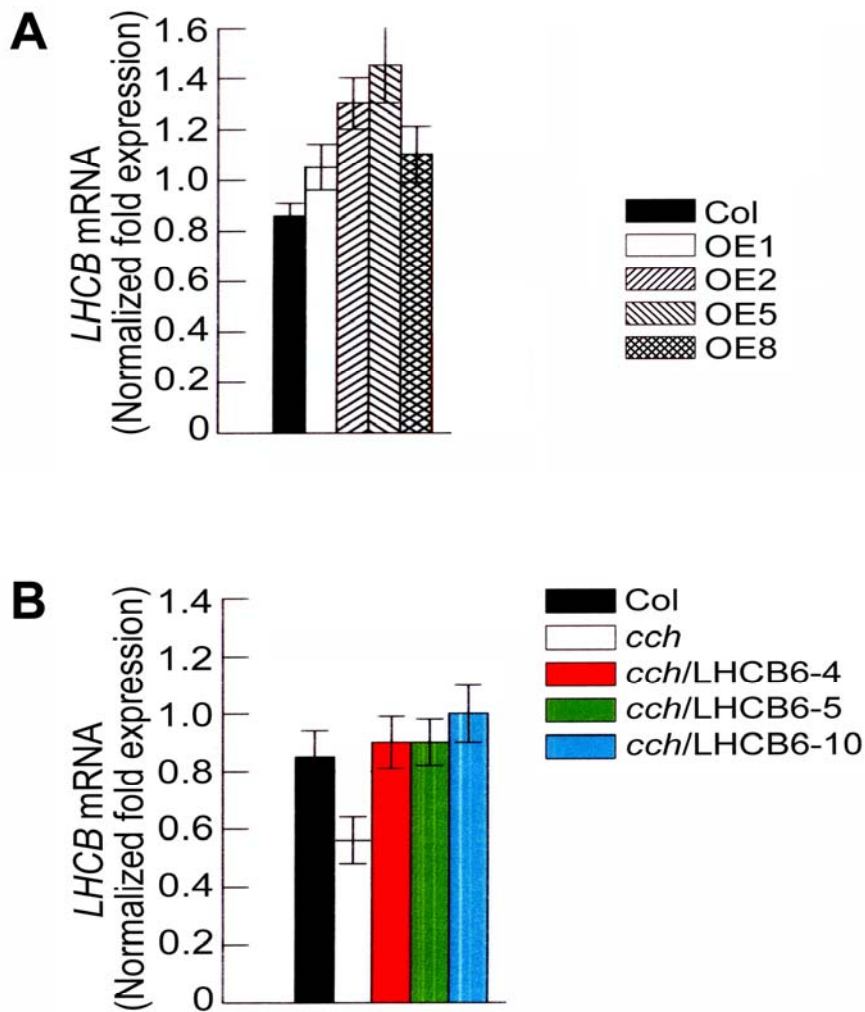

**Supplementary Fig. S2.** Real-time PCR analysis of the *LHC6*-overexpression lines. **(A)** *LHC6* mRNA levels in four overexpression lines (OE1, OE2, OE5, and OE8), showing that the *LHC6* mRNA levels are higher in the OE lines compared with wild-type Col plants. Each value is the mean  $\pm$  SE of three biological determinations. **(B)** *LHC6* mRNA levels in three lines of the *LHC6*-overexpression in the *cch* mutant background (*cch*/LHC6-4, *cch*/LHC6-5, and *cch*/LHC6-10), showing that the *LHC6* mRNA levels in these transgenic lines are similar to those in the wild-type Col plants. Each value is the mean  $\pm$  SE of three biological determinations.

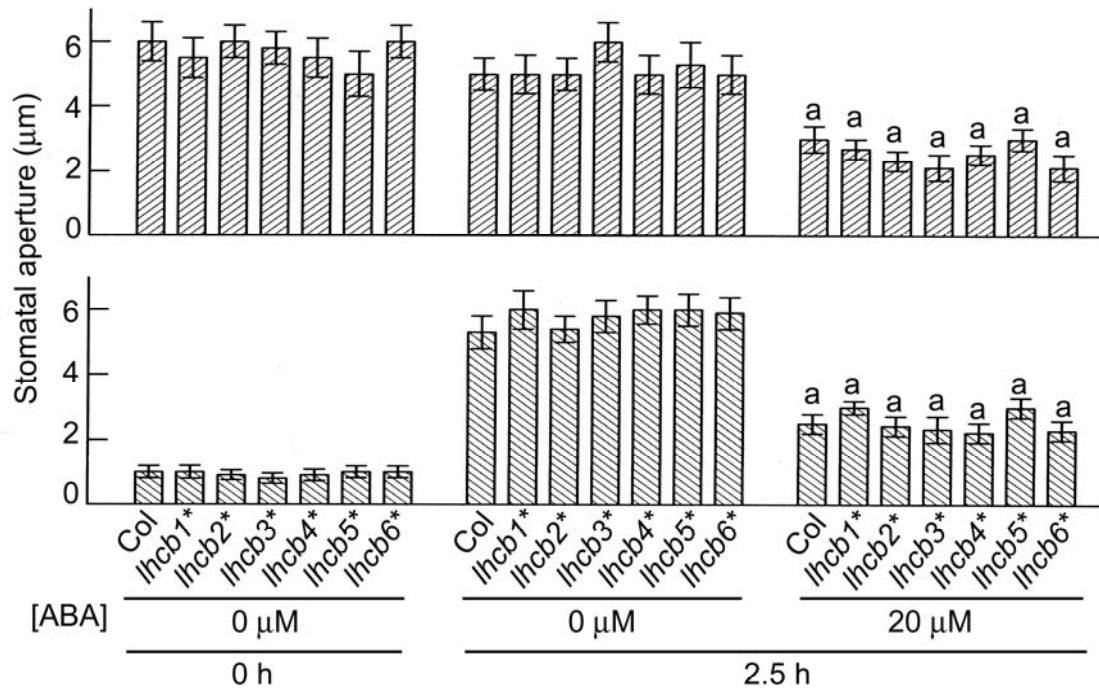

**Supplementary Fig. S3.** Expression of the 35S-promoter-driven *LHC*Bs rescues ABA sensitivity of the *lhc* mutants. ABA-induced stomatal closure (top) and ABA-inhibited stomatal opening (bottom). 0 µM ABA at 0 h, initial stomatal aperture. Stomatal aperture was recorded 2.5 h after the treatment with 0 µM ABA or 20 µM ABA. Each value is the mean ± SE of five independent biological determinations. n = 60 apertures per experiment. The same letters indicate no significant difference at the level of P < 0.05 (Student's t test). Col, wild-type; *lhc1\**, *lhc2\**, *lhc3\**, *lhc4\**, *lhc5\** and *lhc6\** represent the complementation lines expressing, respectively, *LHC*B1, *LHC*B2, *LHC*B3, *LHC*B4, *LHC*B5 and *LHC*B6.

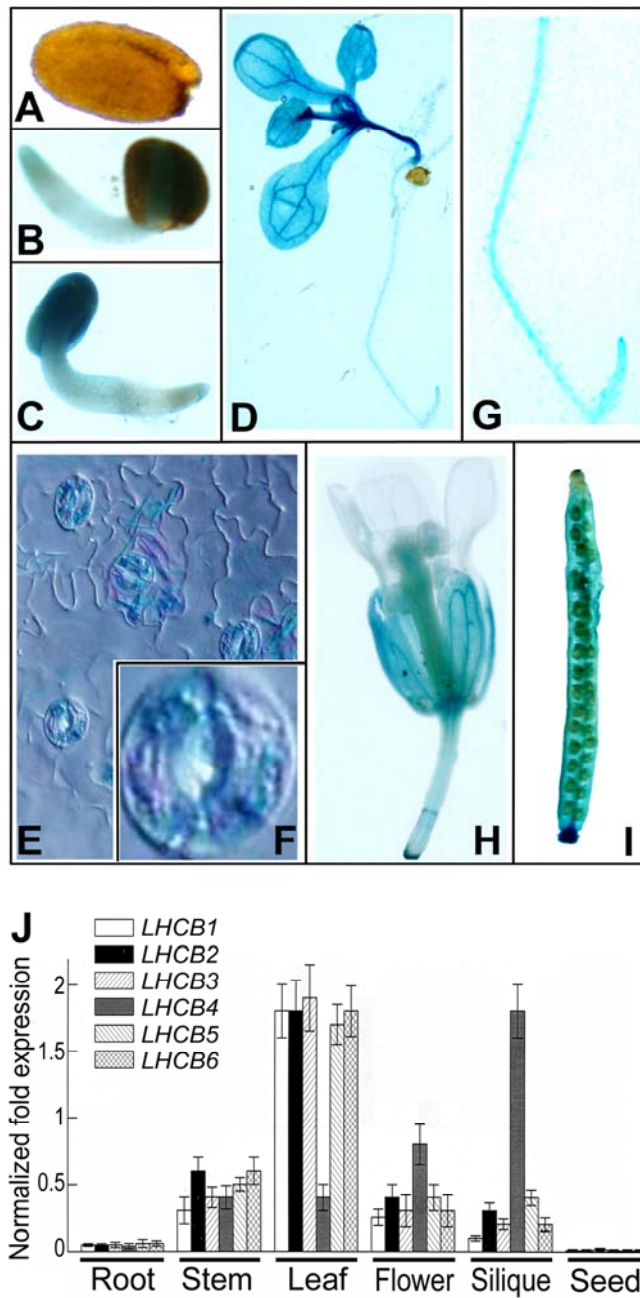

**Supplementary Fig. S4.** Different members of *LHC*s are expressed ubiquitously in different tissues/organs except for dry seeds. The *LHC6* expression was shown by the *LHC6*-promoter-linked GUS-transgenic plants. (A) Dry seed. (B) and (C) Germinating seed. (D) 9-day-old seedling. (E) and (F) Stomata in a matured leaf. Note that *LHC6* is expressed predominantly in the guard cells. (G) Roots. (H) Flower. (I). (J) Real-time PCR data for gene expression of *LHC1*, *LHC2*, *LHC3*, *LHC4*, *LHC5* and *LHC6*.

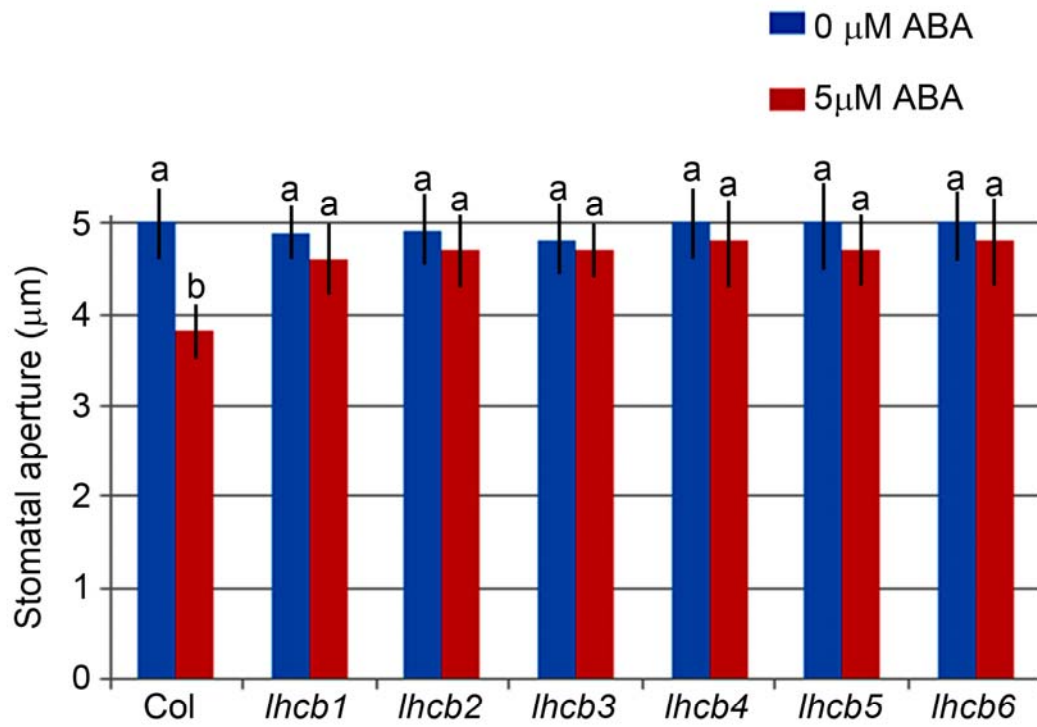

**Supplementary Fig. S5.** Stomatal aperture of Col plants and *lhcb* mutants when assaying ROS levels in stomata. Each value is the mean  $\pm$  SE of three independent biological determinations, and different letters indicates significant differences at  $P < 0.05$  (Duncan's multiple range test). The data of the ROS levels are presented in Fig. 4C.

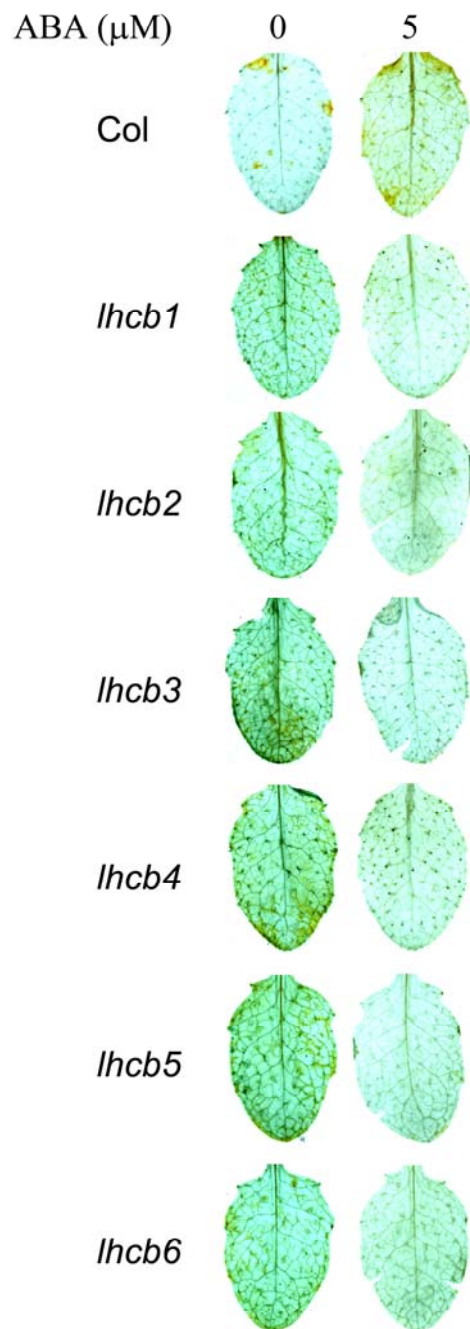

**Supplementary Fig. S6.** ROS homeostasis is altered in *lhcb* mutants.  $\text{H}_2\text{O}_2$  production in leaves in response to ABA (0 and 5  $\mu\text{M}$ ), detected by 3,5-diaminobenzidine (DAB) in wild-type Col and different *lhcb* mutants according to the method as described below. The entire experiment was replicated five times with similar results. **DAB staining** (Method described by Miao et al., 2006): The leaves were collected and vacuum-infiltrated with the DAB solution (1 mg/mL, pH 3.8; Sigma-Aldrich). The sampled leaves were placed under high humidity until reddish-brown precipitate was observed (8 h), then fixed with a solution of 3:1:1 ethanol:lactic acid:glycerol and photographed.

**Reference:** Miao Y, Lv D, Wang P, Wang XC, Chen J, Miao C, Song CP. 2006. An *Arabidopsis* glutathione peroxidase functions as both a redox transducer and a scavenger in abscisic acid and drought stress responses. *Plant Cell* **18**, 2749-2766.

**Supplementary Table S1.** Primers Used in this Study.

**1. Primers for Identification of the *lhcb1*, *lhcb2*, *lhcb3*, *lhcb4*, *lhcb5* and *lhcb6* T-DNA Insertion Knockout/Knockdown Mutants**

The primers for analysis of T-DNA flanking sequence:

LBa1: 5'-GGTTCACGTAGTGGGCCATC-3'

RBa1: 5'-GTTTCTGACGTATGTGCTTAGC-3'

The primers for analysis of the *LHCB* genomic sequences:

LP1 (for *LHCB1*): 5'-GCGACTCTGTAAACCTTCAACG-3'

RP1 (for *LHCB1*): 5'-AAAGTGACGATGAAATCGATTC-3'

LP2 (for *LHCB2*): 5'-TTGTAAGAGCCATAGCCAAGG-3'

RP2 (for *LHCB2*): 5'-ATGGTCCCAAGTACTTGGGAC-3'

LP3 (for *LHCB3*): 5'-ACCCAACGGGTCAAAGTATTG-3'

RP3 (for *LHCB3*): 5'-TTAAATGGGCAACCAGAAAAG-3'

LP4 (for *LHCB4*): 5'-TGGTCTTAAGAATACGACAGAAGG-3'

RP4 (for *LHCB4*): 5'-GGTTTAGGCTTTTGGTTTTGG-3'

LP5 (for *LHCB5*): 5'-CACGAAGAAGCTTGTGAAAGC-3'

RP5 (for *LHCB5*): 5'-AGGAAGAGACGAAACTGCTCC-3'

LP6 (for *LHCB6*): 5'-TAGACTTACGAGCCATCGAGC-3'

RP6 (for *LHCB6*): 5'-TACCACCGACCGTACAAGATC-3'

**2. Primers for Cloning ORF cDNAs of *LHCB1* to *LHCB6* to Rescue the *lhcb1* to *lhcb6* Mutants**

The cDNAs were driven by 35S promoter integrated into pCAMBIA1300-221 vector. The restriction sites are indicated in parenthesis.

*LHCB1* (804 bp) :

forward primer: 5'-TCCCCCGGGATGGCCGCCTCAACAATGG-3' (*SmaI*)

reverse primer: 5'-ACGCGTCGACTCACTTTCCGGGAACAAAGTTG-3' (*Sall*)

*LHCB2* (795 bp) :

forward primer: 5'-GCTCTAGAATGGCCACATCAGCTATCCAAC-3' (*XbaI*)

reverse primer: 5'-GGGGTACCCTTTCCGGGGACAAAGTTAGTAG-3' (*KpnI*)

*LHCB3* (795 bp) :

forward primer: 5'-GCTCTAGAATGGCATCAACATTCACGAGCTC-3' (*XbaI*)

reverse primer: 5'-GGGGTACCAGCTCCAGGTGCAAACCTTAGTTG-3' (*KpnI*)

*LHCB4* (831 bp) :

forward primer: 5'-GCTCTAGAATGGCTACCACCACTGCAG-3' (*XbaI*)

reverse primer: 5'-ACGCGTCGACCTAATTGTTAAAGGTGGCAAGG-3' (*Sall*)

*LHCB5* (843 bp) :

forward primer: 5'-TCCCCCGGGATGGCGTCTTTGGGTGTGTC-3' (*SmaI*)

reverse primer: 5'-ACGCGTCGACTTAGAGAGTGGGAGCTCTCTCGG-3' (*Sall*)

*LHCB6* (777 bp) :

forward primer: 5'-TCCCCCGGGATGGCGATGGCGGTCTCC-3' (*SmaI*)

reverse primer: 5'-ACGCGTCGACTCACAAACCAAGAGCACCGAGAG-3' (*Sall*)

### 3. Gene-Specific Primers for Real-Time PCR Analysis of Gene Expression

*ABF1* (At1g49720):

forward primer: 5'-TCAACAACCTTAGGCGGCGATAC-3'

reverse primer: 5'-GCAACCGAAGATGTAGTAGTCA-3'

*ABF2* (At1g45249):

forward primer: 5'-TTGGGGAATGAGCCACCAGGAG-3'

reverse primer: 5'-GACCCAAAATCTTTCCTACAC-3'

*ABF3* (At4g34000):

forward primer: 5'-CTTTGTTGATGGTGTGAGTGAG-3'

reverse primer: 5'-GTGTTTCCACTATTACCATTGC-3'

*ABF4* (At3g19290):

forward primer: 5'-AACAACTTAGGAGGTGGTGGTC-3'

reverse primer: 5'-CTTCAGGAGTTCATCCATGTTC-3'

*ABI1* (At4g26080):

forward primer: 5'-AGAGTGTGCCTTTGTATGGTTTTA-3'

reverse primer: 5'-CATCCTCTCTCTACAATAGTTCGCT-3'

*ABI2* (At5g57050):

forward primer: 5'-GATGGAAGATTCTGTCTCAACGATT-3'

reverse primer: 5'-GTTTCTCCTTCACTATCTCCTCCG-3'

*ABI3* (At3g24650):

forward primer: 5'-TCCATTAGACAGCAGTCAAGGTTT-3'

reverse primer: 5'-GGTGTCAAAGAACTCGTTGCTATC-3'

*ABI4* (At2g40220):

forward primer: 5'-GGGCAGGAACAAGGAGGAAGTG-3'

reverse primer: 5'-ACGGCGGTGGATGAGTTATTGAT-3'

*ABI5* (At2g36270):

forward primer: 5'-CAATAAGAGAGGGATAGCGAACGAG-3'

reverse primer: 5'-CGTCCATTGCTGTCTCCTCCA-3'

*Actin2/8* :

forward primer: 5'-GGTAACATTGTGCTCAGTGGTGG-3'

reverse primer: 5'-AACGACCTTAATCTTCATGCTGC-3'

*ERD10* (At1g20450):

forward primer: 5'-TCTCTGAACCAGAGTCGTTT-3'

reverse primer: 5'-CTTCTTCTCACCGTCTTCAC-3'

*KINI* (At5g15960):

forward primer: 5'-ACCAACAAGAATGCCTTCCA-3'

reverse primer: 5'-CCGCATCCGATACACTCTTT-3'

*KIN2* (At5g15970):

forward primer: 5'-ACCAACAAGAATGCCTTCCA-3'

reverse primer : 5'-ACTGCCGCATCCGATATACT-3'

*LHCBI*:

forward primer: 5'-ATGGCCGCCTCAACAATGG-3'

reverse primer: 5'-CGGTAAGGTAGCTGGGTGAC-3'



*LHCB2*:

forward primer: 5'-ATGGCCACATCAGCTATCC-3'

reverse primer: 5'-CTCCAGTTAAGTAAGACGGTGTG-3'

*LHCB3*:

forward primer: 5'-AATGATCTTTGGTATGGACCTGAC-3'

reverse primer: 5'-CCACACGGACCCACTTTTG-3'

*LHCB4*:

forward primer: 5'-CAGCCGTACACTGAAGTCTTTGG-3'

reverse primer: 5'-TTCTATCCATATCAACGTCGTCAAC-3'

*LHCB5*:

forward primer: 5'-GGAGCAGCTGGTTTCATCATT-3'

reverse primer: 5'-ATCAAATGGACCTCCTGGG-3'

*LHCB6*:

forward primer: 5'-GCGATGGCAGCGTTCTTG-3'

reverse primer: 5'-CCATGGCGTTGCCACTCA -3'

*MYB2* (At2g47190):

forward primer: 5'-TGCTCGTTGGAACCACATCG-3'

reverse primer: 5'-ACCACCTATTGCCCAAAGAGA-3'

*MYC2* (At1g32640):

forward primer: 5'-TCATACGACGGTTGCCAGAA-3'

reverse primer: 5'-AGCAACGTTTACAAGCTTTGATTG-3'

*OST1* (At4g33950):

forward primer: 5'-TGGAGTTGCGAGATTGATGAGAG-3'

reverse primer: 5'-CCTGTGGTTGATTATCTCCCTTTTT-3'

*RAB18* (At5g66400)

forward primer: 5'-CAGCAGCAGTATGACGAGTA-3'

reverse primer: 5'-CAGTTCCAAAGCCTTCAGTC-3'

*RD29A* (At5g52310) :

forward primer: 5'-ATCACTTGGCTCCACTGTTGTTC-3'

reverse primer: 5'-ACAAAACACACATAAACATCCAAAGT-3'

*RbohD* (At5g47910):

forward primer: 5'-CTAGCTTTGGATTTTTCTCGA-3'

reverse primer: 5'-GTAACCAACAAAACGGTAGGG-3'

*RbohF* (At1g64060):

forward primer: 5'-CTAAAAGACAAGAAGGAAGAAGCC-3'

reverse primer: 5'-CTTCTAGAGTCTCCATCTCATTGTC-3'
